# Supplementary material
Source: PubMed Central journal article supplement (PMC5748913)
Supplement: ASN.2017030350SupplementaryData1.pdf [file ASN.2017030350SupplementaryData1.pdf]

**Supplements:**

**Impaired  $\beta$ -oxidation and altered complex lipid fatty acid partitioning with advancing chronic kidney disease**

**Authors:**

Farsad Afshinnia<sup>1</sup>, Thekkelnaycke M. Rajendiran<sup>2,3</sup>, Tanu Soni<sup>2</sup>, Jaeman Byun<sup>1</sup>, Stefanie Wernisch<sup>1</sup>, Kelli M. Sas<sup>1</sup>, Jennifer Hawkins<sup>1</sup>, Keith Bellovich<sup>4</sup>, Debbie Gipson<sup>5</sup>, George Michailidis<sup>2,6</sup>, Subramaniam Pennathur<sup>1,2,7</sup>, and the Michigan Kidney Translational Core CPROBE Investigator Group\*

<sup>1</sup>University of Michigan, Department of Internal Medicine-Nephrology, Ann Arbor, MI

<sup>2</sup>University of Michigan, Michigan Regional Comprehensive Metabolomics Resource Core, Ann Arbor, MI

<sup>3</sup>University of Michigan, Department of Pathology, Ann Arbor, MI

<sup>4</sup> St. Clair Nephrology Research, Detroit, MI

<sup>5</sup>University of Michigan, Department of Pediatrics, Ann Arbor, MI

<sup>6</sup>University of Florida, Gainesville, FL

<sup>7</sup>University of Michigan, Department of Molecular and Integrative Physiology, Ann Arbor, MI

**Journal:** Journal of American Society of Nephrology

**Supplement Table 1:** Identified lipids by adducts, mass, and retention time in positive and negative modes. The mass accuracy was  $\pm 0.001$  Da in positive mode and  $\pm 0.005$  Da in negative mode, with overall mass error of less than 2 parts per million. CE: Cholesterol Esters; DAG: Diacylglycerol; LPC: Lysophosphatidylcholine; LPE: Lysophosphatidylethanolamine; MAG: Monoacylglycerol; PC: Phosphatidylcholine; pPC: Plasmeyl-Phosphatidylcholine; PE: Phosphatidylethanolamine; pPE: Plasmeyl-Phosphatidylethanolamine; PA: Phosphatidic Acid; SM: Sphingomyelin; TAG: Triacylglycerol; FFA: Free Fatty Acid; CerP: Ceramide-Phosphates; CL: Cardiolipin; PG: Phosphatidylglycerol; PI: Phosphatidylinositol

| <b>Lipids in Positive Mode</b> |                      |                                   |                                   |               |
|--------------------------------|----------------------|-----------------------------------|-----------------------------------|---------------|
| <b>Class</b>                   | <b>Compound name</b> | <b>Type of Adducts</b>            | <b>m/z</b>                        | <b>RT/min</b> |
| CE                             | CE(16:0)             | [M+NH <sub>4</sub> ] <sup>+</sup> | 642.6189                          | 10.94         |
|                                | CE(16:1)             | [M+NH <sub>4</sub> ] <sup>+</sup> | 640.6032                          | 10.68         |
|                                | CE(16:2)             | [M+NH <sub>4</sub> ] <sup>+</sup> | 638.5876                          | 10.51         |
|                                | CE(17:1)             | [M+NH <sub>4</sub> ] <sup>+</sup> | 654.6189                          | 10.87         |
|                                | CE(18:0)             | [M+NH <sub>4</sub> ] <sup>+</sup> | 670.6502                          | 11.38         |
|                                | CE(18:1)             | [M+NH <sub>4</sub> ] <sup>+</sup> | 668.6345                          | 10.92         |
|                                | CE(18:2)             | [M+NH <sub>4</sub> ] <sup>+</sup> | 666.6189                          | 10.74         |
|                                | CE(18:3)             | [M+NH <sub>4</sub> ] <sup>+</sup> | 664.6032                          | 10.49         |
|                                | CE(20:1)             | [M+NH <sub>4</sub> ] <sup>+</sup> | 696.6659                          | 11.3          |
|                                | CE(20:2)             | [M+NH <sub>4</sub> ] <sup>+</sup> | 694.6502                          | 11.09         |
|                                | CE(20:3)             | [M+NH <sub>4</sub> ] <sup>+</sup> | 692.6345                          | 10.76         |
|                                | CE(20:4)             | [M+NH <sub>4</sub> ] <sup>+</sup> | 690.6189                          | 10.55         |
|                                | CE(20:5)             | [M+NH <sub>4</sub> ] <sup>+</sup> | 688.6032                          | 10.43         |
|                                | CE(22:1)             | [M+NH <sub>4</sub> ] <sup>+</sup> | 724.6972                          | 11.74         |
|                                | CE(22:4)             | [M+NH <sub>4</sub> ] <sup>+</sup> | 718.6502                          | 10.87         |
|                                | CE(22:5)             | [M+NH <sub>4</sub> ] <sup>+</sup> | 716.6345                          | 10.69         |
|                                | CE(22:6)             | [M+NH <sub>4</sub> ] <sup>+</sup> | 714.6189                          | 10.48         |
|                                | DAG                  | DAG 28:1                          | [M+NH <sub>4</sub> ] <sup>+</sup> | 528.4625      |
| DAG 30:0                       |                      | [M+NH <sub>4</sub> ] <sup>+</sup> | 558.5094                          | 7.36          |
| DAG 30:1                       |                      | [M+NH <sub>4</sub> ] <sup>+</sup> | 556.4938                          | 6.87          |
| DAG 32:0                       |                      | [M+NH <sub>4</sub> ] <sup>+</sup> | 586.5407                          | 7.89          |
| DAG 32:1                       |                      | [M+NH <sub>4</sub> ] <sup>+</sup> | 584.5251                          | 7.43          |
| DAG 32:2                       |                      | [M+NH <sub>4</sub> ] <sup>+</sup> | 582.5094                          | 7.02          |
| DAG 32:3                       |                      | [M+NH <sub>4</sub> ] <sup>+</sup> | 580.4938                          | 6.55          |
| DAG 33:0                       |                      | [M+NH <sub>4</sub> ] <sup>+</sup> | 600.5564                          | 8.13          |
| DAG 33:1                       |                      | [M+NH <sub>4</sub> ] <sup>+</sup> | 598.5407                          | 7.72          |
| DAG 34:0                       |                      | [M+NH <sub>4</sub> ] <sup>+</sup> | 614.572                           | 8.37          |
| DAG 34:2                       |                      | [M+NH <sub>4</sub> ] <sup>+</sup> | 610.5407                          | 7.54          |
| DAG 34:3                       |                      | [M+NH <sub>4</sub> ] <sup>+</sup> | 608.5251                          | 7.18          |
| DAG 34:4                       |                      | [M+NH <sub>4</sub> ] <sup>+</sup> | 606.5094                          | 6.85          |
| DAG 34:5                       |                      | [M+NH <sub>4</sub> ] <sup>+</sup> | 604.4938                          | 6.49          |

|     |          |                      |          |      |
|-----|----------|----------------------|----------|------|
|     | DAG 35:1 | [M+NH4] <sup>+</sup> | 626.572  | 8.21 |
|     | DAG 35:2 | [M+NH4] <sup>+</sup> | 624.5564 | 7.83 |
|     | DAG 35:3 | [M+NH4] <sup>+</sup> | 622.5407 | 7.45 |
|     | DAG 36:0 | [M+NH4] <sup>+</sup> | 642.6033 | 8.85 |
|     | DAG 36:1 | [M+NH4] <sup>+</sup> | 640.5877 | 8.42 |
|     | DAG 36:2 | [M+NH4] <sup>+</sup> | 638.572  | 8.02 |
|     | DAG 36:3 | [M+NH4] <sup>+</sup> | 636.5564 | 7.66 |
|     | DAG 36:4 | [M+NH4] <sup>+</sup> | 634.5407 | 7.33 |
|     | DAG 36:5 | [M+NH4] <sup>+</sup> | 632.5251 | 6.94 |
|     | DAG 36:6 | [M+NH4] <sup>+</sup> | 630.5094 | 6.65 |
|     | DAG 38:0 | [M+NH4] <sup>+</sup> | 670.6346 | 8.94 |
|     | DAG 38:1 | [M+NH4] <sup>+</sup> | 668.6189 | 8.73 |
|     | DAG 38:2 | [M+NH4] <sup>+</sup> | 666.6033 | 8.49 |
|     | DAG 38:3 | [M+NH4] <sup>+</sup> | 664.5877 | 8.20 |
|     | DAG 38:4 | [M+NH4] <sup>+</sup> | 662.572  | 7.92 |
|     | DAG 38:5 | [M+NH4] <sup>+</sup> | 660.5564 | 7.57 |
|     | DAG 38:6 | [M+NH4] <sup>+</sup> | 658.5407 | 7.27 |
|     | DAG 38:7 | [M+NH4] <sup>+</sup> | 656.5251 | 6.88 |
|     | DAG 40:0 | [M+NH4] <sup>+</sup> | 698.6659 | 9.56 |
|     | DAG 40:5 | [M+NH4] <sup>+</sup> | 688.5877 | 8.03 |
|     | DAG 40:6 | [M+NH4] <sup>+</sup> | 686.572  | 7.74 |
|     | DAG 40:7 | [M+NH4] <sup>+</sup> | 684.5564 | 7.51 |
|     | DAG 40:8 | [M+NH4] <sup>+</sup> | 682.5407 | 7.13 |
| LPC | LPC 14:0 | [M+H] <sup>+</sup>   | 468.309  | 1.08 |
|     | LPC 14:0 | [M+Na] <sup>+</sup>  | 490.291  | 1.05 |
|     | LPC 15:0 | [M+H] <sup>+</sup>   | 482.3246 | 1.20 |
|     | LPC 15:0 | [M+Na] <sup>+</sup>  | 504.3066 | 1.21 |
|     | LPC 16:0 | [M+H] <sup>+</sup>   | 496.3403 | 1.46 |
|     | LPC 16:0 | [M+Na] <sup>+</sup>  | 504.343  | 1.82 |
|     | LPC 16:1 | [M+Na] <sup>+</sup>  | 516.3066 | 1.14 |
|     | LPC 17:0 | [M+Na] <sup>+</sup>  | 532.3379 | 2.20 |
|     | LPC 17:1 | [M+H] <sup>+</sup>   | 508.3403 | 1.40 |
|     | LPC 18:0 | [M+H] <sup>+</sup>   | 524.3716 | 2.30 |
|     | LPC 18:0 | [M+Na] <sup>+</sup>  | 530.3586 | 2.03 |
|     | LPC 18:1 | [M+Na] <sup>+</sup>  | 544.3379 | 1.81 |
|     | LPC 18:2 | [M+Na] <sup>+</sup>  | 542.3223 | 1.09 |
|     | LPC 18:3 | [M+H] <sup>+</sup>   | 518.3246 | 1.09 |
|     | LPC 18:3 | [M+Na] <sup>+</sup>  | 540.3066 | 1.05 |
|     | LPC 19:0 | [M+H] <sup>+</sup>   | 538.3873 | 2.73 |
|     | LPC 19:0 | [M+Na] <sup>+</sup>  | 560.3692 | 2.76 |
|     | LPC 20:0 | [M+H] <sup>+</sup>   | 552.4029 | 3.22 |

|     |          |                                   |          |       |
|-----|----------|-----------------------------------|----------|-------|
|     | LPC 20:0 | [M+Na] <sup>+</sup>               | 574.3848 | 3.17  |
|     | LPC 20:1 | [M+H] <sup>+</sup>                | 550.3873 | 2.48  |
|     | LPC 20:1 | [M+Na] <sup>+</sup>               | 572.3692 | 2.47  |
|     | LPC 20:2 | [M+H] <sup>+</sup>                | 548.3716 | 1.86  |
|     | LPC 20:3 | [M+Na] <sup>+</sup>               | 568.3379 | 1.42  |
|     | LPC 20:5 | [M+H] <sup>+</sup>                | 542.3246 | 1.01  |
|     | LPC 22:0 | [M+H] <sup>+</sup>                | 580.4342 | 4.13  |
|     | LPC 22:4 | [M+H] <sup>+</sup>                | 572.3716 | 1.76  |
|     | LPC 22:4 | [M+Na] <sup>+</sup>               | 594.3535 | 1.82  |
|     | LPC 22:5 | [M+H] <sup>+</sup>                | 570.356  | 1.47  |
|     | LPC 22:5 | [M+Na] <sup>+</sup>               | 592.3379 | 1.45  |
|     | LPC 24:0 | [M+H] <sup>+</sup>                | 608.4655 | 5.03  |
|     | LPC 24:1 | [M+H] <sup>+</sup>                | 606.4498 | 4.18  |
|     | LPC 26:1 | [M+H] <sup>+</sup>                | 634.4812 | 5.02  |
| LPE | LPE 16:0 | [M+H] <sup>+</sup>                | 454.2934 | 1.62  |
|     | LPE 18:0 | [M+H] <sup>+</sup>                | 482.3246 | 2.45  |
|     | LPE 18:0 | [M+Na] <sup>+</sup>               | 504.3066 | 2.46  |
|     | LPE 18:1 | [M+H] <sup>+</sup>                | 480.309  | 1.76  |
|     | LPE 18:2 | [M+H] <sup>+</sup>                | 478.2934 | 1.32  |
|     | LPE 18:3 | [M+H] <sup>+</sup>                | 476.2777 | 1.08  |
|     | LPE 20:3 | [M+H] <sup>+</sup>                | 504.309  | 1.55  |
|     | LPE 20:4 | [M+H] <sup>+</sup>                | 502.2934 | 1.25  |
|     | LPE 22:5 | [M+H] <sup>+</sup>                | 528.309  | 1.46  |
|     | LPE 22:6 | [M+H] <sup>+</sup>                | 526.2933 | 1.19  |
| MAG | MAG 17:0 | [M+Li] <sup>+</sup>               | 351.3087 | 3.12  |
|     | MAG 18:1 | [M+NH <sub>4</sub> ] <sup>+</sup> | 374.327  | 2.90  |
|     | MAG 18:2 | [M+NH <sub>4</sub> ] <sup>+</sup> | 372.3114 | 2.26  |
| PA  | PA 34:0  | [M+Na] <sup>+</sup>               | 699.4941 | 13.75 |
| PC  | PC 28:0  | [M+Na] <sup>+</sup>               | 700.4893 | 5.11  |
|     | PC 30:0  | [M+Na] <sup>+</sup>               | 728.5206 | 5.85  |
|     | PC 30:1  | [M+Na] <sup>+</sup>               | 726.505  | 5.33  |
|     | PC 32:0  | [M+H] <sup>+</sup>                | 734.57   | 5.36  |
|     | PC 32:1  | [M+Na] <sup>+</sup>               | 754.5363 | 5.99  |
|     | PC 32:2  | [M+Na] <sup>+</sup>               | 752.5206 | 5.51  |
|     | PC 33:3  | [M+H] <sup>+</sup>                | 742.5387 | 5.39  |
|     | PC 34:0  | [M+Na] <sup>+</sup>               | 784.5832 | 7.07  |
|     | PC 34:3  | [M+Na] <sup>+</sup>               | 778.5363 | 5.65  |
|     | PC 34:4  | [M+H] <sup>+</sup>                | 754.5387 | 6.02  |
|     | PC 34:4  | [M+Na] <sup>+</sup>               | 776.5206 | 5.49  |
|     | PC 35:5  | [M+H] <sup>+</sup>                | 766.5387 | 5.41  |
|     | PC 36:1  | [M+Na] <sup>+</sup>               | 810.5989 | 7.18  |

|     |          |                     |          |      |
|-----|----------|---------------------|----------|------|
|     | PC 36:3  | [M+H] <sup>+</sup>  | 784.5856 | 7.10 |
|     | PC 36:4  | [M+H] <sup>+</sup>  | 782.57   | 4.68 |
|     | PC 36:4  | [M+Na] <sup>+</sup> | 804.5519 | 5.85 |
|     | PC 36:5  | [M+H] <sup>+</sup>  | 780.5543 | 4.28 |
|     | PC 36:5  | [M+Na] <sup>+</sup> | 802.5363 | 5.58 |
|     | PC 36:6  | [M+Na] <sup>+</sup> | 800.5206 | 5.31 |
|     | PC 36:7  | [M+H] <sup>+</sup>  | 776.523  | 5.25 |
|     | PC 38:4  | [M+Na] <sup>+</sup> | 832.5832 | 6.75 |
|     | PC 38:5  | [M+H] <sup>+</sup>  | 808.5856 | 5.06 |
|     | PC 38:6  | [M+H] <sup>+</sup>  | 806.57   | 4.85 |
|     | PC 38:6  | [M+Na] <sup>+</sup> | 828.5519 | 5.99 |
|     | PC 38:7  | [M+H] <sup>+</sup>  | 804.5543 | 5.87 |
|     | PC 38:7  | [M+Na] <sup>+</sup> | 826.5363 | 5.46 |
|     | PC 38:8  | [M+H] <sup>+</sup>  | 802.5387 | 5.41 |
|     | PC 40:10 | [M+H] <sup>+</sup>  | 826.5387 | 5.55 |
|     | PC 40:8  | [M+Na] <sup>+</sup> | 852.5519 | 5.70 |
|     | PC 40:9  | [M+H] <sup>+</sup>  | 828.5543 | 5.86 |
|     | PC 42:10 | [M+H] <sup>+</sup>  | 854.57   | 5.63 |
|     | PC 42:11 | [M+H] <sup>+</sup>  | 852.5543 | 5.68 |
|     | PC 42:9  | [M+H] <sup>+</sup>  | 856.5856 | 6.69 |
| PE  | PE 34:1  | [M+H] <sup>+</sup>  | 718.5387 | 6.74 |
|     | PE 34:2  | [M+H] <sup>+</sup>  | 716.523  | 6.29 |
|     | PE 34:3  | [M+H] <sup>+</sup>  | 714.5074 | 5.94 |
|     | PE 35:1  | [M+H] <sup>+</sup>  | 732.5543 | 6.99 |
|     | PE 35:2  | [M+H] <sup>+</sup>  | 730.5387 | 6.66 |
|     | PE 36:0  | [M+H] <sup>+</sup>  | 748.5856 | 7.76 |
|     | PE 36:1  | [M+H] <sup>+</sup>  | 746.57   | 7.35 |
|     | PE 36:2  | [M+H] <sup>+</sup>  | 744.5543 | 6.89 |
|     | PE 36:4  | [M+H] <sup>+</sup>  | 740.523  | 6.31 |
|     | PE 36:5  | [M+H] <sup>+</sup>  | 738.5074 | 5.88 |
|     | PE 37:6  | [M+H] <sup>+</sup>  | 750.5074 | 5.86 |
|     | PE 38:3  | [M+H] <sup>+</sup>  | 770.57   | 7.15 |
|     | PE 38:4  | [M+H] <sup>+</sup>  | 768.5543 | 6.90 |
|     | PE 38:6  | [M+H] <sup>+</sup>  | 764.523  | 6.10 |
|     | PE 40:6  | [M+H] <sup>+</sup>  | 792.5543 | 6.86 |
|     | PE 40:7  | [M+H] <sup>+</sup>  | 790.5387 | 6.27 |
| pPC | pPC 18:0 | [M+Na] <sup>+</sup> | 544.3379 | 1.73 |
|     | pPC 20:0 | [M+Na] <sup>+</sup> | 572.3692 | 2.45 |
|     | pPC 36:1 | [M+Na] <sup>+</sup> | 794.604  | 7.48 |
|     | pPC 36:4 | [M+Na] <sup>+</sup> | 788.557  | 6.45 |
|     | pPC 40:4 | [M+Na] <sup>+</sup> | 844.6196 | 7.40 |

|         |                     |                     |          |      |
|---------|---------------------|---------------------|----------|------|
|         | pPC 44:4            | [M+Na] <sup>+</sup> | 900.6822 | 8.16 |
| pPE     | pPE 34:0            | [M+H] <sup>+</sup>  | 704.5594 | 7.55 |
|         | pPE 34:1            | [M+H] <sup>+</sup>  | 702.5438 | 7.10 |
|         | pPE 34:2            | [M+H] <sup>+</sup>  | 700.5281 | 6.65 |
|         | pPE 36:1            | [M+H] <sup>+</sup>  | 730.5751 | 7.62 |
|         | pPE 36:2            | [M+H] <sup>+</sup>  | 728.5594 | 7.20 |
|         | pPE 36:4            | [M+H] <sup>+</sup>  | 724.5281 | 6.58 |
|         | pPE 36:5            | [M+H] <sup>+</sup>  | 722.5125 | 6.25 |
|         | pPE 38:1            | [M+H] <sup>+</sup>  | 758.6063 | 8.08 |
|         | pPE 38:2            | [M+H] <sup>+</sup>  | 756.5907 | 7.81 |
|         | pPE 38:3            | [M+H] <sup>+</sup>  | 754.5751 | 7.42 |
|         | pPE 38:4            | [M+H] <sup>+</sup>  | 752.5594 | 7.21 |
|         | pPE 38:5            | [M+H] <sup>+</sup>  | 750.5438 | 6.71 |
|         | pPE 38:6            | [M+H] <sup>+</sup>  | 748.5281 | 6.49 |
|         | pPE 40:4            | [M+H] <sup>+</sup>  | 780.5907 | 7.70 |
|         | pPE 40:6            | [M+H] <sup>+</sup>  | 776.5594 | 7.12 |
| SM      | SM 21:1             | [M] <sup>+</sup>    | 521.3719 | 1.26 |
|         | SM 28:0             | [M] <sup>+</sup>    | 621.4971 | 3.83 |
|         | SM 30:1             | [M+Na] <sup>+</sup> | 669.4948 | 4.26 |
|         | SM 31:1             | [M] <sup>+</sup>    | 661.5284 | 4.66 |
|         | SM 32:0             | [M+Na] <sup>+</sup> | 699.5417 | 5.36 |
|         | SM 32:1             | [M+Na] <sup>+</sup> | 697.5261 | 4.99 |
|         | SM 32:2             | [M] <sup>+</sup>    | 673.5284 | 4.50 |
|         | SM 32:2             | [M+Na] <sup>+</sup> | 695.5104 | 4.43 |
|         | SM 33:1             | [M+Na] <sup>+</sup> | 711.5417 | 5.37 |
|         | SM 33:2             | [M] <sup>+</sup>    | 687.5441 | 4.85 |
|         | SM 33:2             | [M+Na] <sup>+</sup> | 709.5261 | 4.82 |
|         | SM 34:0             | [M+Na] <sup>+</sup> | 727.573  | 6.03 |
|         | SM 34:1             | [M] <sup>+</sup>    | 703.5754 | 5.73 |
|         | SM 34:1             | [M+Na] <sup>+</sup> | 725.5573 | 5.72 |
|         | SM 34:2             | [M+Na] <sup>+</sup> | 723.5417 | 5.17 |
|         | SM 35:0             | [M] <sup>+</sup>    | 719.6067 | 6.56 |
|         | SM 35:1             | [M+Na] <sup>+</sup> | 739.573  | 6.07 |
|         | SM 35:2             | [M+Na] <sup>+</sup> | 737.5573 | 5.59 |
|         | SM 36:1             | [M+Na] <sup>+</sup> | 753.5886 | 6.46 |
|         | SM 36:2             | [M] <sup>+</sup>    | 729.5911 | 5.89 |
|         | SM 36:2             | [M+Na] <sup>+</sup> | 751.573  | 5.94 |
|         | SM 37:1             | [M] <sup>+</sup>    | 745.6224 | 6.81 |
|         | SM 37:2             | [M] <sup>+</sup>    | 743.6067 | 6.29 |
| SM 38:0 | [M] <sup>+</sup>    | 761.6536            | 7.33     |      |
| SM 38:1 | [M+Na] <sup>+</sup> | 781.6199            | 7.07     |      |

|     |          |                                   |          |       |
|-----|----------|-----------------------------------|----------|-------|
|     | SM 38:4  | [M] <sup>+</sup>                  | 753.5911 | 5.57  |
|     | SM 38:5  | [M] <sup>+</sup>                  | 751.5754 | 5.12  |
|     | SM 39:1  | [M+Na] <sup>+</sup>               | 795.6356 | 7.40  |
|     | SM 39:2  | [M] <sup>+</sup>                  | 771.638  | 6.84  |
|     | SM 40:1  | [M+Na] <sup>+</sup>               | 809.6513 | 7.59  |
|     | SM 40:2  | [M] <sup>+</sup>                  | 785.6536 | 6.88  |
|     | SM 40:2  | [M+Na] <sup>+</sup>               | 807.6356 | 7.18  |
|     | SM 40:4  | [M] <sup>+</sup>                  | 781.6224 | 6.24  |
|     | SM 41:0  | [M] <sup>+</sup>                  | 803.7006 | 8.09  |
|     | SM 41:1  | [M+Na] <sup>+</sup>               | 823.6669 | 7.87  |
|     | SM 41:2  | [M+Na] <sup>+</sup>               | 821.6513 | 7.42  |
|     | SM 41:4  | [M] <sup>+</sup>                  | 795.638  | 6.50  |
|     | SM 42:1  | [M+Na] <sup>+</sup>               | 837.6826 | 8.12  |
|     | SM 42:2  | [M] <sup>+</sup>                  | 813.6849 | 7.64  |
|     | SM 42:2  | [M+Na] <sup>+</sup>               | 835.6669 | 7.64  |
|     | SM 42:4  | [M] <sup>+</sup>                  | 809.6536 | 6.81  |
|     | SM 42:5  | [M] <sup>+</sup>                  | 807.638  | 6.45  |
|     | SM 43:1  | [M] <sup>+</sup>                  | 829.7163 | 8.43  |
|     | SM 43:1  | [M+Na] <sup>+</sup>               | 851.6982 | 8.31  |
|     | SM 43:2  | [M] <sup>+</sup>                  | 827.7006 | 8.05  |
|     | SM 43:2  | [M+Na] <sup>+</sup>               | 849.6826 | 7.79  |
|     | SM 43:4  | [M] <sup>+</sup>                  | 823.6693 | 7.01  |
|     | SM 44:1  | [M] <sup>+</sup>                  | 843.7319 | 8.60  |
|     | SM 44:2  | [M] <sup>+</sup>                  | 841.7163 | 8.13  |
| TAG | TAG 40:0 | [M+NH <sub>4</sub> ] <sup>+</sup> | 712.6451 | 9.49  |
|     | TAG 42:0 | [M+Na] <sup>+</sup>               | 745.6318 | 9.77  |
|     | TAG 42:0 | [M+NH <sub>4</sub> ] <sup>+</sup> | 740.6764 | 9.76  |
|     | TAG 42:1 | [M+NH <sub>4</sub> ] <sup>+</sup> | 738.6608 | 9.50  |
|     | TAG 44:1 | [M+NH <sub>4</sub> ] <sup>+</sup> | 766.6921 | 9.82  |
|     | TAG 44:2 | [M+NH <sub>4</sub> ] <sup>+</sup> | 764.6764 | 9.53  |
|     | TAG 46:0 | [M+NH <sub>4</sub> ] <sup>+</sup> | 796.739  | 10.31 |
|     | TAG 46:1 | [M+NH <sub>4</sub> ] <sup>+</sup> | 794.7233 | 10.07 |
|     | TAG 46:2 | [M+NH <sub>4</sub> ] <sup>+</sup> | 792.7077 | 9.83  |
|     | TAG 46:3 | [M+NH <sub>4</sub> ] <sup>+</sup> | 790.6921 | 9.59  |
|     | TAG 48:0 | [M+NH <sub>4</sub> ] <sup>+</sup> | 824.7702 | 10.54 |
|     | TAG 48:1 | [M+Na] <sup>+</sup>               | 827.71   | 8.98  |
|     | TAG 48:1 | [M+NH <sub>4</sub> ] <sup>+</sup> | 822.7546 | 10.31 |
|     | TAG 48:2 | [M+NH <sub>4</sub> ] <sup>+</sup> | 820.739  | 10.09 |
|     | TAG 48:3 | [M+NH <sub>4</sub> ] <sup>+</sup> | 818.7233 | 9.86  |
|     | TAG 49:0 | [M+NH <sub>4</sub> ] <sup>+</sup> | 838.7859 | 10.68 |
|     | TAG 49:1 | [M+NH <sub>4</sub> ] <sup>+</sup> | 836.7702 | 10.48 |

|          |                      |          |       |
|----------|----------------------|----------|-------|
| TAG 49:2 | [M+NH4] <sup>+</sup> | 834.7546 | 10.24 |
| TAG 50:0 | [M+NH4] <sup>+</sup> | 852.8015 | 10.80 |
| TAG 50:1 | [M+Na] <sup>+</sup>  | 855.7413 | 9.29  |
| TAG 50:1 | [M+NH4] <sup>+</sup> | 850.7859 | 10.54 |
| TAG 50:2 | [M+NH4] <sup>+</sup> | 848.7702 | 10.34 |
| TAG 50:3 | [M+NH4] <sup>+</sup> | 846.7546 | 10.13 |
| TAG 50:4 | [M+NH4] <sup>+</sup> | 844.739  | 9.93  |
| TAG 50:5 | [M+NH4] <sup>+</sup> | 842.7233 | 9.74  |
| TAG 51:1 | [M+NH4] <sup>+</sup> | 864.8015 | 10.71 |
| TAG 51:2 | [M+NH4] <sup>+</sup> | 862.7859 | 10.51 |
| TAG 51:3 | [M+NH4] <sup>+</sup> | 860.7702 | 10.31 |
| TAG 51:4 | [M+NH4] <sup>+</sup> | 858.7546 | 10.11 |
| TAG 52:0 | [M+NH4] <sup>+</sup> | 880.8328 | 11.04 |
| TAG 52:1 | [M+Na] <sup>+</sup>  | 883.7726 | 10.68 |
| TAG 52:1 | [M+NH4] <sup>+</sup> | 878.8172 | 10.82 |
| TAG 52:2 | [M+NH4] <sup>+</sup> | 876.8015 | 10.57 |
| TAG 52:3 | [M+Na] <sup>+</sup>  | 879.7413 | 10.40 |
| TAG 52:3 | [M+NH4] <sup>+</sup> | 874.7859 | 10.38 |
| TAG 52:4 | [M+Na] <sup>+</sup>  | 877.7257 | 10.22 |
| TAG 52:4 | [M+NH4] <sup>+</sup> | 872.7702 | 10.19 |
| TAG 52:5 | [M+Na] <sup>+</sup>  | 875.71   | 10.01 |
| TAG 52:5 | [M+NH4] <sup>+</sup> | 870.7546 | 9.99  |
| TAG 52:6 | [M+Na] <sup>+</sup>  | 873.6944 | 9.80  |
| TAG 52:6 | [M+NH4] <sup>+</sup> | 868.739  | 9.81  |
| TAG 52:7 | [M+NH4] <sup>+</sup> | 866.7233 | 9.61  |
| TAG 53:0 | [M+NH4] <sup>+</sup> | 894.8484 | 11.16 |
| TAG 53:1 | [M+NH4] <sup>+</sup> | 892.8328 | 10.93 |
| TAG 53:2 | [M+NH4] <sup>+</sup> | 890.8172 | 10.74 |
| TAG 53:3 | [M+NH4] <sup>+</sup> | 888.8015 | 10.54 |
| TAG 53:4 | [M+NH4] <sup>+</sup> | 886.7859 | 10.35 |
| TAG 53:5 | [M+NH4] <sup>+</sup> | 884.7702 | 10.17 |
| TAG 53:6 | [M+NH4] <sup>+</sup> | 882.7546 | 9.96  |
| TAG 53:7 | [M+NH4] <sup>+</sup> | 880.739  | 9.77  |
| TAG 54:0 | [M+Na] <sup>+</sup>  | 913.8195 | 11.28 |
| TAG 54:0 | [M+NH4] <sup>+</sup> | 908.8641 | 11.28 |
| TAG 54:1 | [M+Na] <sup>+</sup>  | 911.8038 | 11.03 |
| TAG 54:1 | [M+NH4] <sup>+</sup> | 906.8484 | 11.06 |
| TAG 54:2 | [M+Na] <sup>+</sup>  | 909.7882 | 10.87 |
| TAG 54:2 | [M+NH4] <sup>+</sup> | 904.8328 | 10.85 |
| TAG 54:3 | [M+Na] <sup>+</sup>  | 907.7726 | 10.69 |
| TAG 54:3 | [M+NH4] <sup>+</sup> | 902.8172 | 10.66 |



|           |                      |          |       |
|-----------|----------------------|----------|-------|
| TAG 54:4  | [M+NH4] <sup>+</sup> | 900.8015 | 10.44 |
| TAG 54:5  | [M+Na] <sup>+</sup>  | 903.7413 | 10.33 |
| TAG 54:5  | [M+NH4] <sup>+</sup> | 898.7859 | 10.24 |
| TAG 54:6  | [M+Na] <sup>+</sup>  | 901.7257 | 10.06 |
| TAG 54:6  | [M+NH4] <sup>+</sup> | 896.7702 | 10.06 |
| TAG 54:7  | [M+Na] <sup>+</sup>  | 899.71   | 9.85  |
| TAG 54:7  | [M+NH4] <sup>+</sup> | 894.7546 | 9.90  |
| TAG 54:8  | [M+NH4] <sup>+</sup> | 892.739  | 9.71  |
| TAG 55:0  | [M+NH4] <sup>+</sup> | 922.8797 | 11.39 |
| TAG 55:1  | [M+NH4] <sup>+</sup> | 920.8641 | 11.17 |
| TAG 55:3  | [M+NH4] <sup>+</sup> | 916.8328 | 10.77 |
| TAG 55:5  | [M+NH4] <sup>+</sup> | 912.8015 | 10.46 |
| TAG 55:6  | [M+NH4] <sup>+</sup> | 910.7859 | 10.29 |
| TAG 56:0  | [M+NH4] <sup>+</sup> | 936.8954 | 11.54 |
| TAG 56:1  | [M+NH4] <sup>+</sup> | 934.8797 | 11.30 |
| TAG 56:2  | [M+NH4] <sup>+</sup> | 932.8641 | 11.09 |
| TAG 56:3  | [M+NH4] <sup>+</sup> | 930.8484 | 10.88 |
| TAG 56:4  | [M+NH4] <sup>+</sup> | 928.8328 | 10.71 |
| TAG 56:5  | [M+Na] <sup>+</sup>  | 931.7726 | 10.57 |
| TAG 56:5  | [M+NH4] <sup>+</sup> | 926.8172 | 10.55 |
| TAG 56:6  | [M+NH4] <sup>+</sup> | 924.8015 | 10.38 |
| TAG 56:7  | [M+Na] <sup>+</sup>  | 927.7413 | 10.20 |
| TAG 56:7  | [M+NH4] <sup>+</sup> | 922.7859 | 10.20 |
| TAG 56:8  | [M+NH4] <sup>+</sup> | 920.7702 | 10.02 |
| TAG 56:9  | [M+Na] <sup>+</sup>  | 923.71   | 9.87  |
| TAG 56:9  | [M+NH4] <sup>+</sup> | 918.7546 | 9.82  |
| TAG 57:2  | [M+NH4] <sup>+</sup> | 946.8797 | 11.23 |
| TAG 57:3  | [M+NH4] <sup>+</sup> | 944.8641 | 11.00 |
| TAG 57:6  | [M+NH4] <sup>+</sup> | 938.8172 | 10.50 |
| TAG 57:7  | [M+NH4] <sup>+</sup> | 936.8015 | 10.36 |
| TAG 57:8  | [M+NH4] <sup>+</sup> | 934.7859 | 10.17 |
| TAG 58:0  | [M+NH4] <sup>+</sup> | 964.9267 | 11.85 |
| TAG 58:1  | [M+NH4] <sup>+</sup> | 962.911  | 11.57 |
| TAG 58:10 | [M+NH4] <sup>+</sup> | 944.7702 | 9.95  |
| TAG 58:11 | [M+NH4] <sup>+</sup> | 942.7546 | 9.77  |
| TAG 58:12 | [M+NH4] <sup>+</sup> | 940.739  | 9.57  |
| TAG 58:2  | [M+NH4] <sup>+</sup> | 960.8954 | 11.32 |
| TAG 58:3  | [M+NH4] <sup>+</sup> | 958.8797 | 11.12 |
| TAG 58:4  | [M+NH4] <sup>+</sup> | 956.8641 | 10.93 |
| TAG 58:5  | [M+NH4] <sup>+</sup> | 954.8484 | 10.80 |
| TAG 58:6  | [M+NH4] <sup>+</sup> | 952.8328 | 10.60 |

|  |           |                      |          |       |
|--|-----------|----------------------|----------|-------|
|  | TAG 58:7  | [M+NH4] <sup>+</sup> | 950.8172 | 10.50 |
|  | TAG 58:8  | [M+NH4] <sup>+</sup> | 948.8015 | 10.29 |
|  | TAG 58:9  | [M+NH4] <sup>+</sup> | 946.7859 | 10.14 |
|  | TAG 60:10 | [M+NH4] <sup>+</sup> | 972.8015 | 10.18 |
|  | TAG 60:11 | [M+NH4] <sup>+</sup> | 970.7859 | 10.09 |
|  | TAG 60:12 | [M+NH4] <sup>+</sup> | 968.7702 | 9.90  |
|  | TAG 60:15 | [M+NH4] <sup>+</sup> | 962.7233 | 9.31  |
|  | TAG 60:3  | [M+NH4] <sup>+</sup> | 986.911  | 11.24 |
|  | TAG 60:8  | [M+NH4] <sup>+</sup> | 976.8328 | 10.53 |
|  | TAG 62:12 | [M+NH4] <sup>+</sup> | 996.8015 | 10.17 |
|  | TAG 62:14 | [M+NH4] <sup>+</sup> | 992.7702 | 9.84  |
|  | TAG 62:3  | [M+NH4] <sup>+</sup> | 1014.942 | 11.58 |

| <b>Lipids in Negative Mode</b> |                    |                         |            |               |
|--------------------------------|--------------------|-------------------------|------------|---------------|
| <b>Class</b>                   | <b>Sample.Name</b> | <b>Adducts</b>          | <b>m/z</b> | <b>RT/min</b> |
| FFA                            | FFA (16:0)         |                         | 255.2329   | 2.30          |
|                                | FFA(18:0)          |                         | 283.2642   | 3.27          |
|                                | FFA(18:1)          |                         | 281.2486   | 2.50          |
|                                | FFA(18:2)          |                         | 279.2329   | 1.92          |
|                                | FFA(20:0)          |                         | 311.2955   | 4.30          |
|                                | FFA(20:1)          |                         | 309.2799   | 3.45          |
|                                | FFA(20:2)          |                         | 307.2642   | 2.82          |
|                                | FFA (20:4)         |                         | 303.2329   | 1.85          |
|                                | FFA(22:0)          |                         | 339.3268   | 5.29          |
|                                | FFA(22:1)          |                         | 337.3112   | 4.43          |
|                                | FFA(22:2)          |                         | 335.2955   | 3.76          |
|                                | FFA(22:3)          |                         | 333.2799   | 3.18          |
|                                | FFA(24:0)          |                         | 367.3581   | 6.21          |
|                                | FFA(24:1)          |                         | 365.3425   | 5.36          |
|                                | FFA(24:2)          |                         | 363.3268   | 4.70          |
| FFA(24:3)                      |                    | 361.3112                | 4.07       |               |
| CerP                           | CerP 32:1          | [M-H] <sup>-</sup>      | 588.4393   | 5.02          |
|                                | CerP 34:1          | [M-H] <sup>-</sup>      | 616.4706   | 5.75          |
| CL                             | CL 66:1            | [M-2H](2 <sup>-</sup> ) | 688.4861   | 6.17          |
|                                | CL 70:5            | [M-2H](2 <sup>-</sup> ) | 712.4861   | 5.95          |
|                                | CL 72:3            | [M-2H](2 <sup>-</sup> ) | 728.5174   | 7.52          |
|                                | CL 74:1            | [M-2H](2 <sup>-</sup> ) | 744.5487   | 6.75          |
|                                | CL 74:3            | [M-2H](2 <sup>-</sup> ) | 742.5331   | 5.67          |
|                                | CL 74:5            | [M-2H](2 <sup>-</sup> ) | 740.5174   | 5.83          |
|                                | CL 74:7            | [M-2H](2 <sup>-</sup> ) | 738.5018   | 6.03          |
|                                | CL 76:11           | [M-2H](2 <sup>-</sup> ) | 748.4861   | 5.88          |

|     |          |            |          |      |
|-----|----------|------------|----------|------|
|     | CL 78:3  | [M-2H](2-) | 770.5644 | 7.41 |
|     | CL 78:5  | [M-2H](2-) | 768.5487 | 6.31 |
|     | CL 82:13 | [M-2H](2-) | 788.5174 | 6.32 |
|     | CL 82:9  | [M-2H](2-) | 792.5487 | 7.01 |
| LPE | LPE 16:0 | [M-H]-     | 452.2777 | 1.60 |
|     | LPE 17:0 | [M-H]-     | 466.2934 | 1.92 |
|     | LPE 18:0 | [M-H]-     | 480.309  | 2.34 |
|     | LPE 18:1 | [M-H]-     | 478.2934 | 1.76 |
|     | LPE 18:2 | [M-H]-     | 476.2777 | 1.31 |
|     | LPE 20:3 | [M-H]-     | 502.2934 | 1.59 |
|     | LPE 20:4 | [M-H]-     | 500.2777 | 1.29 |
|     | LPE 20:5 | [M-H]-     | 498.2621 | 1.05 |
|     | LPE 22:4 | [M-H]-     | 528.309  | 1.85 |
|     | LPE 22:5 | [M-H]-     | 526.2934 | 1.49 |
|     | LPE 22:6 | [M-H]-     | 524.2777 | 1.26 |
|     | LPE 24:0 | [M-H]-     | 564.403  | 5.18 |
| PA  | PA 34:1  | [M-H]-     | 673.4808 | 6.58 |
|     | PA 34:2  | [M-H]-     | 671.4652 | 6.15 |
|     | PA 36:4  | [M-H]-     | 695.4652 | 6.08 |
|     | PA 38:6  | [M-H]-     | 719.4652 | 6.03 |
| PC  | PC 24:0  | [M-Ac-H]-  | 680.4503 | 3.58 |
|     | PC 26:0  | [M-Ac-H]-  | 708.4816 | 4.38 |
|     | PC 28:0  | [M-Ac-H]-  | 736.5129 | 5.15 |
|     | PC 29:0  | [M-Ac-H]-  | 750.5285 | 5.48 |
|     | PC 30:0  | [M-Ac-H]-  | 764.5442 | 5.87 |
|     | PC 30:1  | [M-Ac-H]-  | 762.5285 | 5.31 |
|     | PC 31:0  | [M-Ac-H]-  | 778.5598 | 6.03 |
|     | PC 32:0  | [M-Ac-H]-  | 792.5754 | 6.50 |
|     | PC 32:1  | [M-Ac-H]-  | 790.5598 | 6.01 |
|     | PC 32:2  | [M-Ac-H]-  | 788.5442 | 5.51 |
|     | PC 32:3  | [M-Ac-H]-  | 786.5285 | 5.06 |
|     | PC 33:0  | [M-Ac-H]-  | 806.5911 | 6.71 |
|     | PC 33:1  | [M-Ac-H]-  | 804.5754 | 6.33 |
|     | PC 33:2  | [M-Ac-H]-  | 802.5598 | 5.87 |
|     | PC 33:3  | [M-Ac-H]-  | 800.5442 | 5.43 |
|     | PC 34:0  | [M-Ac-H]-  | 820.6068 | 7.06 |
|     | PC 34:1  | [M-Ac-H]-  | 818.5911 | 6.56 |
|     | PC 34:2  | [M-Ac-H]-  | 816.5754 | 4.60 |
|     | PC 34:3  | [M-Ac-H]-  | 814.5598 | 5.69 |
|     | PC 34:4  | [M-Ac-H]-  | 812.5442 | 5.46 |
|     | PC 34:5  | [M-Ac-H]-  | 810.5285 | 5.05 |

|  |          |           |          |      |
|--|----------|-----------|----------|------|
|  | PC 35:1  | [M-Ac-H]- | 832.6068 | 6.91 |
|  | PC 35:2  | [M-Ac-H]- | 830.5911 | 6.45 |
|  | PC 35:3  | [M-Ac-H]- | 828.5754 | 6.02 |
|  | PC 35:4  | [M-Ac-H]- | 826.5598 | 5.85 |
|  | PC 35:5  | [M-Ac-H]- | 824.5442 | 5.42 |
|  | PC 36:1  | [M-Ac-H]- | 846.6224 | 7.16 |
|  | PC 36:2  | [M-Ac-H]- | 844.6068 | 6.72 |
|  | PC 36:3  | [M-Ac-H]- | 842.5911 | 4.71 |
|  | PC 36:4  | [M-Ac-H]- | 840.5754 | 4.96 |
|  | PC 36:5  | [M-Ac-H]- | 838.5598 | 5.57 |
|  | PC 36:6  | [M-Ac-H]- | 836.5442 | 5.34 |
|  | PC 37:1  | [M-Ac-H]- | 860.6381 | 7.39 |
|  | PC 37:2  | [M-Ac-H]- | 858.6224 | 7.06 |
|  | PC 37:3  | [M-Ac-H]- | 856.6068 | 6.65 |
|  | PC 37:4  | [M-Ac-H]- | 854.5911 | 6.44 |
|  | PC 37:5  | [M-Ac-H]- | 852.5754 | 5.96 |
|  | PC 37:6  | [M-Ac-H]- | 850.5598 | 5.71 |
|  | PC 38:1  | [M-Ac-H]- | 874.6537 | 7.6  |
|  | PC 38:2  | [M-Ac-H]- | 872.6381 | 7.32 |
|  | PC 38:3  | [M-Ac-H]- | 870.6224 | 6.97 |
|  | PC 38:4  | [M-Ac-H]- | 868.6068 | 6.65 |
|  | PC 38:5  | [M-Ac-H]- | 866.5911 | 6.27 |
|  | PC 38:6  | [M-Ac-H]- | 864.5754 | 5.92 |
|  | PC 38:7  | [M-Ac-H]- | 862.5598 | 5.45 |
|  | PC 39:4  | [M-Ac-H]- | 882.6224 | 6.98 |
|  | PC 39:5  | [M-Ac-H]- | 880.6068 | 6.53 |
|  | PC 39:6  | [M-Ac-H]- | 878.5911 | 6.32 |
|  | PC 40:1  | [M-Ac-H]- | 902.685  | 8.19 |
|  | PC 40:2  | [M-Ac-H]- | 900.6694 | 7.94 |
|  | PC 40:3  | [M-Ac-H]- | 898.6537 | 7.42 |
|  | PC 40:4  | [M-Ac-H]- | 896.6381 | 7.19 |
|  | PC 40:5  | [M-Ac-H]- | 894.6224 | 6.94 |
|  | PC 40:6  | [M-Ac-H]- | 892.6068 | 6.58 |
|  | PC 40:7  | [M-Ac-H]- | 890.5911 | 6.10 |
|  | PC 40:8  | [M-Ac-H]- | 888.5754 | 5.70 |
|  | PC 40:9  | [M-Ac-H]- | 886.5598 | 5.30 |
|  | PC 42:10 | [M-Ac-H]- | 912.5754 | 5.63 |
|  | PC 42:2  | [M-Ac-H]- | 928.7007 | 8.38 |
|  | PC 42:4  | [M-Ac-H]- | 924.6694 | 7.84 |
|  | PC 42:5  | [M-Ac-H]- | 922.6537 | 7.32 |
|  | PC 42:7  | [M-Ac-H]- | 918.6224 | 6.73 |

|         |         |           |          |      |
|---------|---------|-----------|----------|------|
|         | PC 44:2 | [M-Ac-H]- | 956.7319 | 8.86 |
|         | PC 44:4 | [M-Ac-H]- | 952.7007 | 8.37 |
|         | PC 44:5 | [M-Ac-H]- | 950.685  | 7.86 |
| PE      | PE 30:0 | [M-H]-    | 662.4761 | 6.03 |
|         | PE 32:0 | [M-H]-    | 690.5074 | 6.65 |
|         | PE 32:1 | [M-H]-    | 688.4917 | 6.18 |
|         | PE 32:2 | [M-H]-    | 686.4761 | 5.65 |
|         | PE 33:1 | [M-H]-    | 702.5074 | 6.47 |
|         | PE 33:2 | [M-H]-    | 700.4917 | 6.02 |
|         | PE 34:1 | [M-H]-    | 716.5231 | 6.78 |
|         | PE 34:2 | [M-H]-    | 714.5074 | 5.02 |
|         | PE 34:2 | [M-H]-    | 714.5074 | 6.31 |
|         | PE 34:3 | [M-H]-    | 712.4917 | 5.98 |
|         | PE 34:4 | [M-H]-    | 710.4761 | 5.64 |
|         | PE 35:0 | [M-H]-    | 732.5543 | 7.49 |
|         | PE 35:1 | [M-H]-    | 730.5387 | 7.05 |
|         | PE 35:2 | [M-H]-    | 728.5231 | 6.60 |
|         | PE 35:3 | [M-H]-    | 726.5074 | 6.17 |
|         | PE 35:4 | [M-H]-    | 724.4917 | 6.00 |
|         | PE 36:0 | [M-H]-    | 746.57   | 7.77 |
|         | PE 36:1 | [M-H]-    | 744.5543 | 7.35 |
|         | PE 36:2 | [M-H]-    | 742.5387 | 6.91 |
|         | PE 36:3 | [M-H]-    | 740.5231 | 6.46 |
|         | PE 36:4 | [M-H]-    | 738.5074 | 6.14 |
|         | PE 36:5 | [M-H]-    | 736.4917 | 5.88 |
|         | PE 37:2 | [M-H]-    | 756.5543 | 6.15 |
|         | PE 37:3 | [M-H]-    | 754.5387 | 6.74 |
|         | PE 37:4 | [M-H]-    | 752.5231 | 6.62 |
|         | PE 37:5 | [M-H]-    | 750.5074 | 6.03 |
|         | PE 38:1 | [M-H]-    | 772.5856 | 7.82 |
|         | PE 38:2 | [M-H]-    | 770.57   | 7.41 |
|         | PE 38:3 | [M-H]-    | 768.5543 | 7.15 |
|         | PE 38:4 | [M-H]-    | 766.5387 | 6.89 |
|         | PE 38:5 | [M-H]-    | 764.5231 | 6.45 |
|         | PE 38:6 | [M-H]-    | 762.5074 | 6.09 |
|         | PE 39:4 | [M-H]-    | 780.5543 | 7.04 |
| PE 39:5 | [M-H]-  | 778.5387  | 6.60     |      |
| PE 39:6 | [M-H]-  | 776.5231  | 6.46     |      |
| PE 40:3 | [M-H]-  | 796.5856  | 6.99     |      |
| PE 40:4 | [M-H]-  | 794.57    | 7.35     |      |
| PE 40:5 | [M-H]-  | 792.5543  | 7.05     |      |

|     |          |        |          |      |
|-----|----------|--------|----------|------|
|     | PE 40:6  | [M-H]- | 790.5387 | 6.81 |
|     | PE 40:7  | [M-H]- | 788.5231 | 6.32 |
|     | PE 40:8  | [M-H]- | 786.5074 | 5.91 |
|     | PE 42:8  | [M-H]- | 814.5387 | 6.43 |
|     | PE 42:9  | [M-H]- | 812.5231 | 6.00 |
| PG  | PG 33:0  | [M-H]- | 735.5176 | 6.08 |
|     | PG 34:1  | [M-H]- | 747.5176 | 5.88 |
|     | PG 34:2  | [M-H]- | 745.5019 | 5.47 |
|     | PG 36:0  | [M-H]- | 777.5646 | 6.90 |
|     | PG 36:1  | [M-H]- | 775.5489 | 6.47 |
|     | PG 36:2  | [M-H]- | 773.5333 | 6.04 |
|     | PG 36:3  | [M-H]- | 771.5176 | 5.41 |
|     | PG 36:4  | [M-H]- | 769.5019 | 5.46 |
|     | PG 38:4  | [M-H]- | 797.5333 | 6.07 |
| PI  | PI 34:1  | [M-H]- | 835.5337 | 5.72 |
|     | PI 34:2  | [M-H]- | 833.518  | 5.28 |
|     | PI 36:1  | [M-H]- | 863.5649 | 6.33 |
|     | PI 36:2  | [M-H]- | 861.5493 | 5.91 |
|     | PI 36:3  | [M-H]- | 859.5337 | 5.43 |
|     | PI 36:4  | [M-H]- | 857.518  | 5.27 |
|     | PI 38:3  | [M-H]- | 887.5649 | 6.12 |
|     | PI 38:4  | [M-H]- | 885.5493 | 5.89 |
|     | PI 38:5  | [M-H]- | 883.5337 | 5.41 |
|     | PI 40:6  | [M-H]- | 909.5493 | 5.83 |
| pPE | pPE 32:0 | [M-H]- | 674.5124 | 7.04 |
|     | pPE 32:1 | [M-H]- | 672.4968 | 6.51 |
|     | pPE 34:0 | [M-H]- | 702.5438 | 7.25 |
|     | pPE 34:1 | [M-H]- | 700.5281 | 7.08 |
|     | pPE 34:2 | [M-H]- | 698.5124 | 6.64 |
|     | pPE 34:3 | [M-H]- | 696.4968 | 6.28 |
|     | pPE 36:0 | [M-H]- | 730.5751 | 8.04 |
|     | pPE 36:1 | [M-H]- | 728.5594 | 7.64 |
|     | pPE 36:2 | [M-H]- | 726.5438 | 7.24 |
|     | pPE 36:3 | [M-H]- | 724.5281 | 6.83 |
|     | pPE 36:4 | [M-H]- | 722.5124 | 6.59 |
|     | pPE 36:5 | [M-H]- | 720.4968 | 6.26 |
|     | pPE 38:1 | [M-H]- | 756.5907 | 8.14 |
|     | pPE 38:2 | [M-H]- | 754.5751 | 7.78 |
|     | pPE 38:3 | [M-H]- | 752.5594 | 7.42 |
|     | pPE 38:4 | [M-H]- | 750.5438 | 7.15 |
|     | pPE 38:5 | [M-H]- | 748.5281 | 6.66 |

|  |          |        |          |      |
|--|----------|--------|----------|------|
|  | pPE 38:6 | [M-H]- | 746.5124 | 6.48 |
|  | pPE 40:3 | [M-H]- | 780.5907 | 7.70 |
|  | pPE 40:4 | [M-H]- | 778.5751 | 7.68 |
|  | pPE 40:5 | [M-H]- | 776.5594 | 7.24 |
|  | pPE 40:5 | [M-H]- | 776.5594 | 7.48 |
|  | pPE 40:6 | [M-H]- | 774.5438 | 7.10 |
|  | pPE 42:5 | [M-H]- | 804.5907 | 7.80 |
|  | pPE 42:6 | [M-H]- | 802.5751 | 7.68 |

**Supplement Table 2:** Alignment of various lipid species in to different principle components using principle component analysis.

| TAG       |          |           | DAG       |          | SM        |          |          | CE        |          | CL      |          |
|-----------|----------|-----------|-----------|----------|-----------|----------|----------|-----------|----------|---------|----------|
| Short LDB | Long LDB | Long HDB  | Short LDB | Long HDB | Short LDB | Long LDB | Long HDB | Short LDB | Long HDB | LDB     | HDB      |
| TAG 40:0  | TAG 54:0 | TAG 52:7  | DAG 30:0  | DAG 34:2 | SM 30:1   | SM 38:1  | SM 34:1  | CE 16:1   | CE 20:4  | CL 74:3 | CL 66:1  |
| TAG 42:0  | TAG 54:1 | TAG 54:8  | DAG 30:1  | DAG 34:3 | SM 32:1   | SM 40:1  | SM 36:2  | CE 16:2   | CE 22:4  | CL 78:3 | CL 70:5  |
| TAG 42:1  | TAG 54:2 | TAG 56:6  | DAG 32:0  | DAG 34:4 | SM 32:2   | SM 42:1  | SM 38:0  | CE 18:1   | CE 22:5  | CL 78:5 | CL 74:1  |
| TAG 44:1  | TAG 54:3 | TAG 56:7  | DAG 32:1  | DAG 36:4 | SM 34:2   |          | SM 38:4  | CE 20:2   | CE 22:6  |         | CL 74:7  |
| TAG 44:2  | TAG 54:4 | TAG 56:8  | DAG 32:2  | DAG 36:5 |           |          | SM 40:4  | CE 20:3   |          |         | CL 76:11 |
| TAG 46:0  | TAG 56:1 | TAG 56:9  | DAG 34:0  | DAG 36:6 |           |          | SM 42:2  |           |          |         | CL 82:13 |
| TAG 46:1  | TAG 56:2 | TAG 58:10 | DAG 36:0  | DAG 38:5 |           |          | SM 42:4  |           |          |         | CL 82:9  |
| TAG 46:2  | TAG 56:3 | TAG 58:11 |           | DAG 38:6 |           |          | SM 42:5  |           |          |         |          |
| TAG 46:3  | TAG 56:4 | TAG 58:12 |           | DAG 38:7 |           |          | SM 44:1  |           |          |         |          |
| TAG 48:0  | TAG 58:0 | TAG 58:6  |           | DAG 40:7 |           |          | SM 44:2  |           |          |         |          |
| TAG 48:1  | TAG 58:1 | TAG 58:7  |           | DAG 40:8 |           |          |          |           |          |         |          |
| TAG 48:2  | TAG 58:2 | TAG 58:8  |           |          |           |          |          |           |          |         |          |
| TAG 48:3  | TAG 58:3 | TAG 58:9  |           |          |           |          |          |           |          |         |          |
| TAG 50:0  | TAG 58:4 | TAG 60:10 |           |          |           |          |          |           |          |         |          |
| TAG 50:1  | TAG 60:3 | TAG 60:11 |           |          |           |          |          |           |          |         |          |
| TAG 50:2  | TAG 62:3 | TAG 60:12 |           |          |           |          |          |           |          |         |          |
| TAG 50:3  |          | TAG 60:8  |           |          |           |          |          |           |          |         |          |
| TAG 52:0  |          | TAG 62:12 |           |          |           |          |          |           |          |         |          |
| TAG 52:1  |          | TAG 62:14 |           |          |           |          |          |           |          |         |          |

| PE        |                  |          |          | pPE       |          | pPC       |          | PI        |          |
|-----------|------------------|----------|----------|-----------|----------|-----------|----------|-----------|----------|
| Short LDB | Intermediate LDB | Long LDB | Long HDB | Short LDB | Long HDB | Short LDB | Long HDB | Short LDB | Long HDB |
| PE 30:0   | PE 34:1          | PE 32:2  | PE 38:6  | pPE 32:0  | pPE 38:4 | pPC 18:0  | pPC 36:1 | PI 34:1   | PI 36:4  |
| PE 32:0   | PE 34:2          | PE 34:4  | PE 40:6  | pPE 32:1  | pPE 38:5 | pPC 20:0  | pPC 40:4 | PI 34:2   | PI 38:3  |
| PE 32:1   | PE 34:3          | PE 38:1  | PE 40:7  | pPE 36:0  | pPE 38:6 |           | pPC 44:4 | PI 36:1   | PI 38:4  |
| PE 38:5   | PE 36:1          | PE 38:2  | PE 38:4  |           | pPE 40:5 |           |          | PI 36:2   | PI 38:5  |
|           | PE 36:2          | PE 40:3  | PE 40:8  |           | pPE 40:6 |           |          | PI 36:3   | PI 40:6  |
|           | PE 36:3          | PE 40:4  |          |           | pPE 42:5 |           |          |           |          |
|           | PE 36:4          |          |          |           | pPE 42:6 |           |          |           |          |
|           | PE 38:3          |          |          |           |          |           |          |           |          |



Note: LDB=Low Double Bond, HDB=High Double Bond; CE: Cholesterol Esters; DAG: Diacylglycerol; PE: Phosphatidylethanolamine; pPC: Plasmeyl-Phosphatidylcholine; pPE: Plasmeyl-Phosphatidylethanolamine; SM: Sphingomyelin; TAG: Triacylglycerol; CL: Cardiolipin; PI: Phosphatidylinositol

**Supplement Table 3:** Free fatty acids (FFA) subtypes independently associated with complex lipid sub-classes of cholesterol ester (CE), lysophosphatidylcholine (LPC), Lysophosphatidylethanolamine (LPE), plasmeyl-phosphatidylethanolamine (pPE), plasmeyl-phosphatidylcholine (pPC), sphingomyelin (SM), and phosphatidylinositol (PI) using multiple linear regression models adjusted for age, sex, and race. Complex lipid sub-classes as well as FFA cutoff for acyl chain length are defined by principle component analysis. Acyl chain >20 carbons (>C-20), Acyl chain ≤20 (≤C-20).

| <b>Complex lipid Sub-Classes (Dependent variable)</b> | <b>Independent FFA associates</b> | <b>B</b> | <b>SE</b> | <b>r</b> | <b>P.Val</b> |
|-------------------------------------------------------|-----------------------------------|----------|-----------|----------|--------------|
| Short, low-double-bond CE                             | Length >C-20                      | 0.441    | 0.137     | 0.321    | 0.001        |
|                                                       | Length ≤C-20                      | -0.275   | 0.133     | -0.209   | 0.040        |
| Low-double-bond-Cardiolipins                          | Length >C-20                      | 0.658    | 0.134     | 0.478    | <0.001       |
|                                                       | Length ≤C-20                      | -0.266   | 0.130     | -0.202   | 0.043        |
| low-double-bond LPC                                   | Length >C-20                      | 0.455    | 0.141     | 0.331    | 0.001        |
|                                                       | Length ≤C-20                      | -0.323   | 0.137     | -0.246   | 0.019        |
| Long, high-double-bond LPE                            | Length ≤C-20                      | 0.211    | 0.089     | 0.161    | 0.018        |
| Long, low-double-bond pPE                             | Length >C-20                      | 0.319    | 0.090     | 0.232    | <0.001       |
| Short, low-double-bond pPE                            | Length >C-20                      | 0.262    | 0.092     | 0.190    | 0.005        |
| Long, high-double-bond SM                             | Length ≤C-20                      | 0.166    | 0.081     | 0.126    | 0.042        |
| Long, Low-double-bond SM                              | Length >C-20                      | 0.209    | 0.093     | 0.152    | 0.026        |
| Short, low-double-bond PI                             | Length >C-20                      | 0.558    | 0.138     | 0.406    | <0.001       |
|                                                       | Length ≤C-20                      | -0.439   | 0.133     | -0.335   | 0.001        |
| Short, low-double-bond pPC                            | Length ≤C-20                      | 0.489    | 0.081     | 0.373    | <0.001       |

**Supplement Table 4:** Comparing the patients' characteristics and backgrounds in selected sub-cohort as compared to the rest of the cohort shows that overall the selected patients are similar to the rest of the unselected patients suggesting that the selected sub-cohort is an unbiased representative of the entire cohort.

|                                               | <b>GFR<math>\geq</math>60<br/>(Stage 1&amp;2)</b> | <b>GFR 30-59<br/>(Stage 3)</b> | <b>GFR 15-29<br/>(Stage 4)</b> | <b>GFR&lt;15<br/>(Stage 5)</b> | <b>P<br/>value</b> |
|-----------------------------------------------|---------------------------------------------------|--------------------------------|--------------------------------|--------------------------------|--------------------|
| <b>N: Selected/Unselected</b>                 | 36/374                                            | 99/471                         | 61/162                         | 18/14                          |                    |
| <b>Age: Selected</b>                          | 46 $\pm$ 15 <sup>a</sup>                          | 62 $\pm$ 14                    | 62 $\pm$ 14                    | 66 $\pm$ 18                    | 0.032              |
| <b>Age: Unselected</b>                        | 44 $\pm$ 15                                       | 59 $\pm$ 13                    | 60 $\pm$ 15                    | 59 $\pm$ 13                    |                    |
| <b>Male Sex (%): Selected</b>                 | 17 (47.2)                                         | 49 (49.5)                      | 36 (59.0)                      | 8 (44.4)                       | 0.702              |
| <b>Male Sex (%): Unselected</b>               | 155 (41.4)                                        | 215 (45.6)                     | 81 (50.0)                      | 10 (71.4)                      |                    |
| <b>White race (%): Selected</b>               | 27 (75.0)                                         | 68 (68.7)                      | 43 (70.5)                      | 12 (66.7)                      | 0.205              |
| <b>White race (%): Unselected</b>             | 206 (55.1)                                        | 228 (48.4)                     | 93 (57.4)                      | 10 (71.4)                      |                    |
| <b>SBP (mmHg): Selected</b>                   | 132 $\pm$ 21                                      | 133 $\pm$ 21                   | 139 $\pm$ 21                   | 146 $\pm$ 26                   | 0.896              |
| <b>SBP (mmHg): Unselected</b>                 | 130 $\pm$ 18                                      | 136 $\pm$ 20                   | 138 $\pm$ 22                   | 145 $\pm$ 25                   |                    |
| <b>DBP (mmHg): Selected</b>                   | 77 $\pm$ 10                                       | 72 $\pm$ 10                    | 76 $\pm$ 13                    | 78 $\pm$ 13                    | 0.779              |
| <b>DBP (mmHg): Unselected</b>                 | 77 $\pm$ 12                                       | 76 $\pm$ 12                    | 75 $\pm$ 13                    | 74 $\pm$ 10                    |                    |
| <b>Height (m): Selected</b>                   | 1.7 $\pm$ 0.1                                     | 1.7 $\pm$ 0.1                  | 1.7 $\pm$ 0.2                  | 1.7 $\pm$ 0.1                  | 0.363              |
| <b>Height (m): Unselected</b>                 | 1.7 $\pm$ 0.1                                     | 1.7 $\pm$ 0.1                  | 1.7 $\pm$ 0.1                  | 1.7 $\pm$ 0.1                  |                    |
| <b>Weight (kg): Selected</b>                  | 83 $\pm$ 19                                       | 93 $\pm$ 23                    | 91 $\pm$ 20                    | 84 $\pm$ 16                    | 0.635              |
| <b>Weight (kg): Unselected</b>                | 89 $\pm$ 25                                       | 92 $\pm$ 26                    | 91 $\pm$ 25                    | 82 $\pm$ 18                    |                    |
| <b>BMI (kg/m<sup>2</sup>): Selected</b>       | 28.1 $\pm$ 5.5 <sup>b</sup>                       | 32.5 $\pm$ 7.3                 | 30.9 $\pm$ 6.9                 | 29.6 $\pm$ 4.2                 | 0.316              |
| <b>BMI (kg/m<sup>2</sup>): Unselected</b>     | 31.3 $\pm$ 7.9                                    | 32.8 $\pm$ 8.6                 | 32.0 $\pm$ 9.6                 | 27.9 $\pm$ 5.2                 |                    |
| <b>Comorbidities</b>                          |                                                   |                                |                                |                                |                    |
| <b>Hypertension (%): Selected</b>             | 27 (75.0)                                         | 79 (79.8)                      | 53 (86.9)                      | 17 (94.0)                      | 0.937              |
| <b>Hypertension (%): Unselected</b>           | 253 (67.6)                                        | 412 (88.0)                     | 138 (86.3)                     | 13 (92.9)                      |                    |
| <b>Diabetes (%): Selected</b>                 | 5 (13.9)                                          | 41 (41.4)                      | 35 (57.4)                      | 8 (44.4)                       | 0.651              |
| <b>Diabetes (%): Unselected</b>               | 95 (25.5)                                         | 207 (44.2)                     | 75 (46.9)                      | 7 (50.0)                       |                    |
| <b>Heart Failure (%): Selected</b>            | 1 (2.8)                                           | 16 (16.2)                      | 12 (19.7)                      | 2 (11.1)                       | 0.578              |
| <b>Heart Failure (%): Unselected</b>          | 15 (4.0)                                          | 56 (12.0)                      | 20 (12.5)                      | 4 (28.6)                       |                    |
| <b>PVD (%): Selected</b>                      | 1 (2.8)                                           | 14 (14.1)                      | 12 (19.7)                      | 2 (11.1)                       | 0.043              |
| <b>PVD (%): Unselected</b>                    | 15 (4.0)                                          | 56 (12.0)                      | 20 (12.5)                      | 4 (28.6)                       |                    |
| <b>Nephrotic syndrome (%): Selected</b>       | 1 (2.8)                                           | 11 (11.1)                      | 4 (6.6)                        | 1 (5.6)                        | 0.760              |
| <b>Nephrotic syndrome (%): Unselected</b>     | 47 (12.6)                                         | 17 (3.6)                       | 10 (6.2)                       | 1 (7.1)                        |                    |
| <b>Medications</b>                            |                                                   |                                |                                |                                |                    |
| <b>Statins (%): Selected</b>                  | 14 (38.9)                                         | 54 (54.5)                      | 36 (59.0)                      | 10 (55.6)                      | 0.328              |
| <b>Statins (%): Unselected</b>                | 114 (30.5)                                        | 227 (48.2)                     | 83 (51.2)                      | 8 (57.1)                       |                    |
| <b>Fibrates (%): Selected</b>                 | 0 (0)                                             | 10 (10.1)                      | 8 (13.1)                       | 0 (0)                          | 0.151              |
| <b>Fibrates (%): Unselected</b>               | 12 (3.2)                                          | 17 (3.6)                       | 6 (3.7)                        | 0 (0)                          |                    |
| <b>Niacin (%): Selected</b>                   | 1 (2.8)                                           | 5 (5.1)                        | 1 (1.6)                        | 0 (0)                          | 0.306              |
| <b>Niacin (%): Unselected</b>                 | 2 (0.5)                                           | 3 (0.6)                        | 5 (3.1)                        | 0 (0)                          |                    |
| <b>Steroids (%): Selected</b>                 | 9 (25.0)                                          | 14 (14.1)                      | 5 (8.2)                        | 2 (11.1)                       | 0.279              |
| <b>Steroids (%): Unselected</b>               | 98 (26.2)                                         | 40 (8.5)                       | 12 (7.4)                       | 0 (0)                          |                    |
| <b>Mycophenolate (%): Selected</b>            | 6 (16.7)                                          | 8 (8.1)                        | 3 (4.9)                        | 1 (5.6)                        | 0.167              |
| <b>Mycophenolate (%): Unselected</b>          | 53 (14.2)                                         | 17 (3.6)                       | 3 (1.9)                        | 0 (0)                          |                    |
| <b>Albumin (g/dL): Selected</b>               | 4.1 $\pm$ 0.5                                     | 4.1 $\pm$ 0.5                  | 4.0 $\pm$ 0.4                  | 3.9 $\pm$ 0.3                  | <0.001             |
| <b>Albumin (g/dL): Unselected</b>             | 3.8 $\pm$ 0.7                                     | 4.0 $\pm$ 0.5                  | 3.9 $\pm$ 0.6                  | 3.4 $\pm$ 0.4                  |                    |
| <b>UPCR: Selected</b>                         | 0.5 [0.2-1.6]                                     | 0.4 [0.1-1.7]                  | 0.8 [0.2-3.0]                  | 1.4 [0.3-3.3]                  | 0.051              |
| <b>UPCR: Unselected</b>                       | 0.9 [0.2-2.2]                                     | 0.4 [0.1-1.6]                  | 1.0 [0.3-3.3]                  | 4.5 [2.9-10.9]                 |                    |
| <b>WBC (1000/<math>\mu</math>L): Selected</b> | 6.8 $\pm$ 2.5                                     | 7.4 $\pm$ 3.1                  | 7.1 $\pm$ 3.2                  | 6.5 $\pm$ 1.8                  | 0.060              |

|                                                 |               |               |               |               |       |
|-------------------------------------------------|---------------|---------------|---------------|---------------|-------|
| <b>WBC (1000/<math>\mu</math>L): Unselected</b> | 7.4 $\pm$ 2.8 | 7.6 $\pm$ 2.9 | 7.8 $\pm$ 2.7 | 7.4 $\pm$ 2.1 |       |
| <b>eGFR (mL/min): Selected</b>                  | 82 $\pm$ 15   | 41 $\pm$ 8    | 23 $\pm$ 4    | 14 $\pm$ 10   | 0.180 |
| <b>eGFR (mL/min): Unselected</b>                | 91 $\pm$ 24   | 44 $\pm$ 8    | 23 $\pm$ 4    | 14 $\pm$ 11   |       |

Serum albumin in unselected cohort is measured in 333, 364, 126, and 13 patients from CKD stage 2 to 5, respectively, in the unselected cohort. Urine protein: creatinine ratio is measured in 236, 222, 103, and 10 patients in patients from CKD stage 2 to 5, respectively, in the unselected cohort. The p values are the product of the main effect comparison of the selected versus unselected cohorts for each variable using a 2-way analysis of variance in generalized linear models, except for that of UPCR which is product of the Mann-Whitney test. SBP: Systolic blood pressure; DBP: Diastolic blood pressure; BMI: Body mass index; PVD: Peripheral vascular disease; UPCR: Urine protein: creatinine ratio; WBC: White blood cell count; eGFR: Estimated glomerular filtration rate. Values are mean $\pm$ SD, count (%), or median [interquartile range].

**Supplement Figure 1:** Comparing standardized mean values of other complex lipids by carbon number and number of double bonds in CKD stages 2 to 5. The significance of the interaction term of change in abundance of lipid by carbon number and number of double bonds from CKD stage 2 to 5 is shown by p values in the diagonal of each lipid class, using mixed linear model. CE: Cholesterol Esters; LPC: Lysophosphatidylcholine; LPE: Lysophosphatidylethanolamine; PC: Phosphatidylcholine; pPC: Plasmeyl-Phosphatidylcholine; pPE: Plasmeyl-Phosphatidylethanolamine; PA: Phosphatidic Acid; SM: Sphingomyelin; CerP: Ceramide-Phosphates; CL: Cardiolipin; PI: Phosphatidylinositol

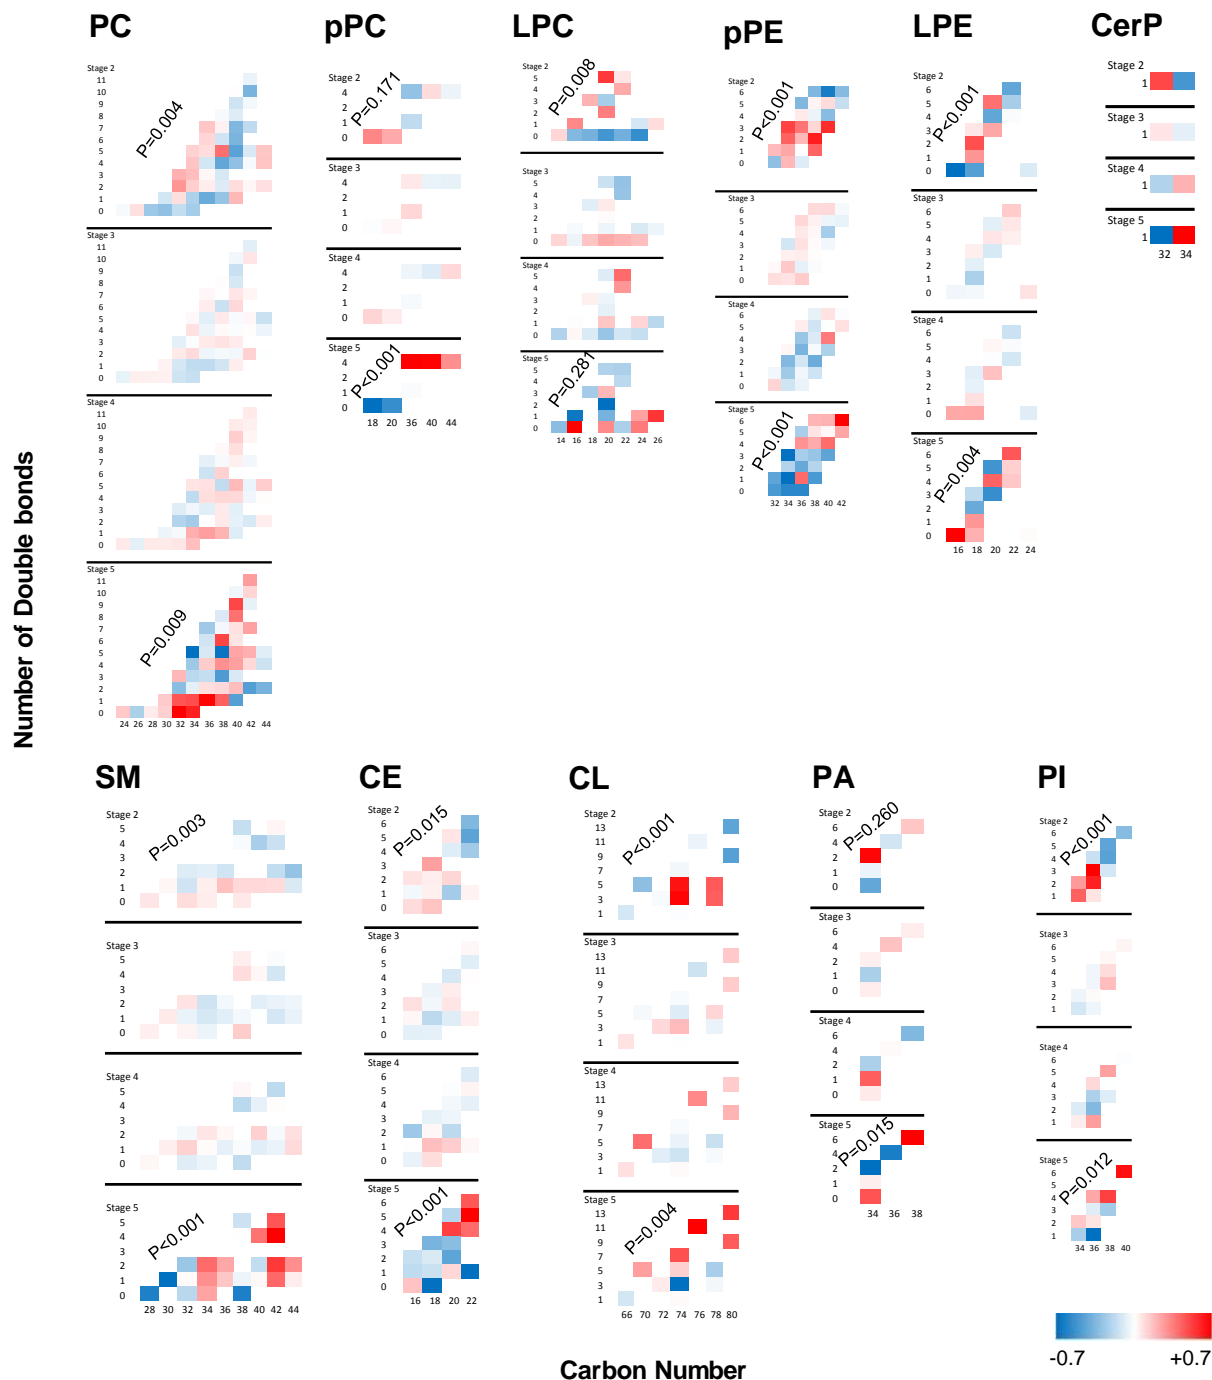

**Supplement Figure 2:** Comparing mean standardized values of medium chain acylcarnitines compared with L-Carnitine in CKD stage 2 (panel A) and CKD stage 5 (panel B). The lower level of C8:1 acylcarnitine compared with L-carnitine ( $p < 0.001$ ) in CKD stage 2 reached statistical significance. Corresponding values of no other medium chain acylcarnitine were significantly different from L-Carnitine in CKD stage 2 and stage 5. Mean of intermediate acylcarnitines (AC) as compared with L-carnitine was not different within each stage of CKD (panel C). Overall, the trend of long-intermediate acylcarnitine ratio from stage 2 to stage 5 was similar to trend of long acylcarnitine-L-Carnitine ratio (panel D).

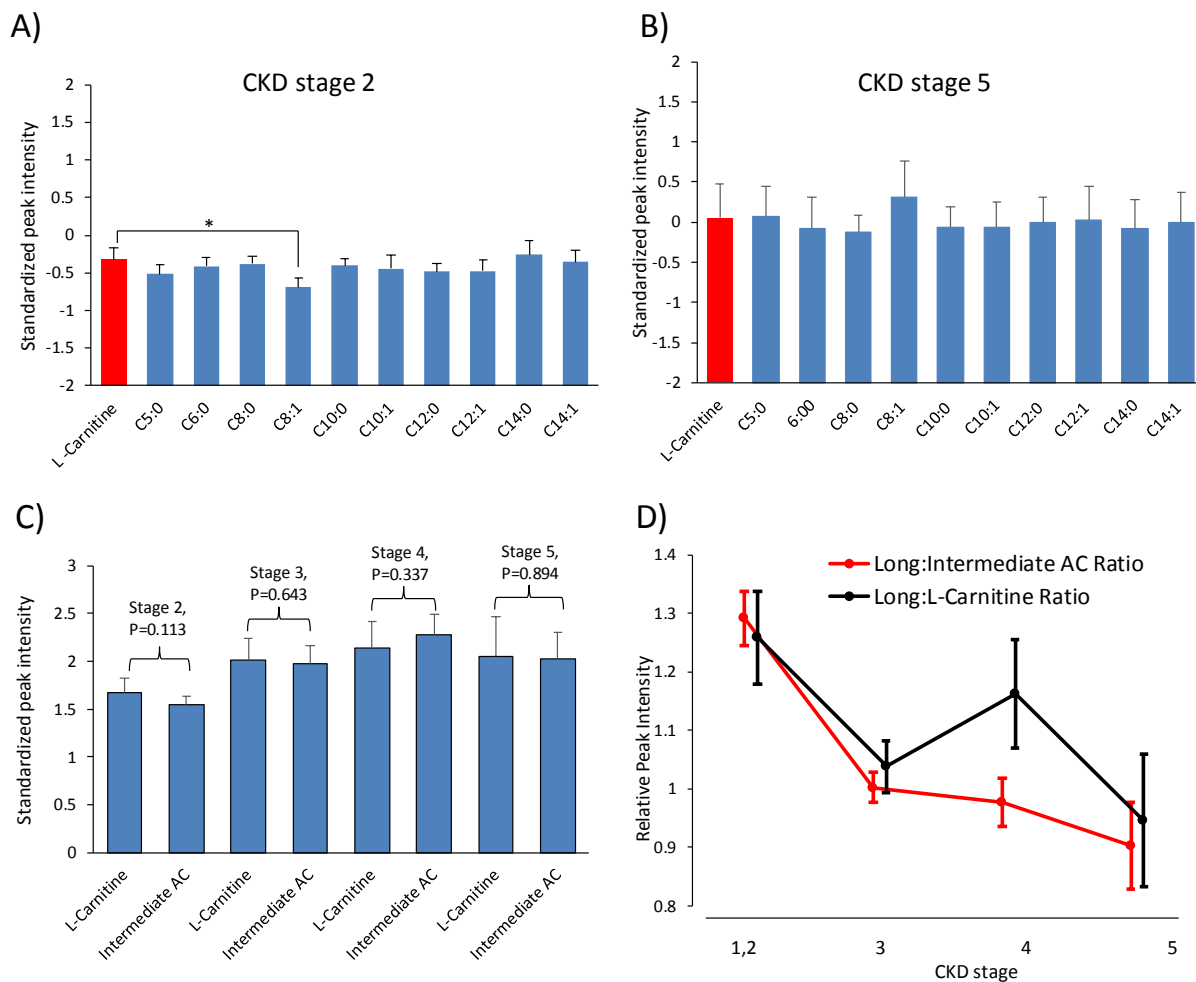

**Supplement Figure 3:** Comparing inter- (Panel A) and intra-assay (Panel B) coefficient of variation (CV) of different internal standards in test pool and control plasma in the lipidomic platform on log2 scale. Control plasma is reference sample obtained from American Red Cross. Test pool is pool of study samples. IS: internal standard; CE: Cholesterol Esters; TAG: Triacylglycerol; DG: Diacylglycerol; PC: Phosphatidylcholine; MG: Monoacylglycerol; PE: Phosphatidylethanolamine; PS: Phosphatidylserine; SM: Sphingomyelin

A)

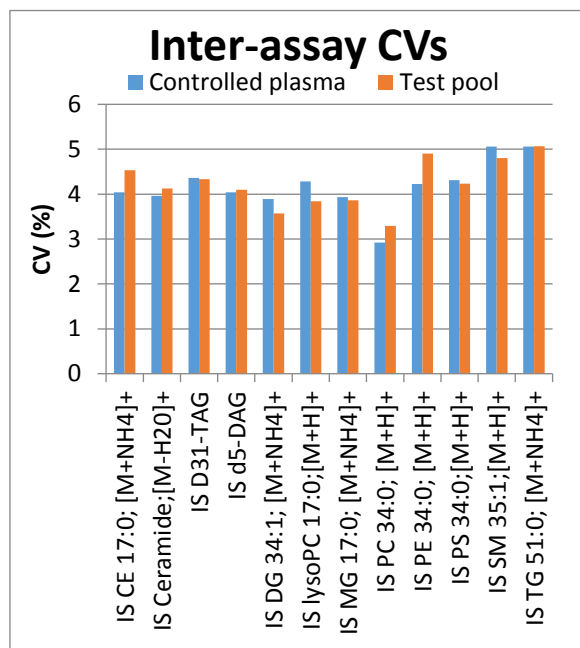

B)

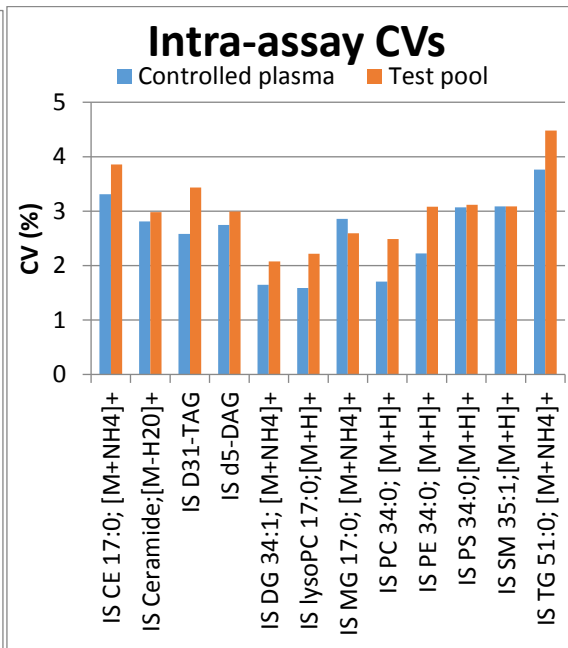

**Supplement Figure 4:** Negligible batch to batch variability of internal standards in reference pools

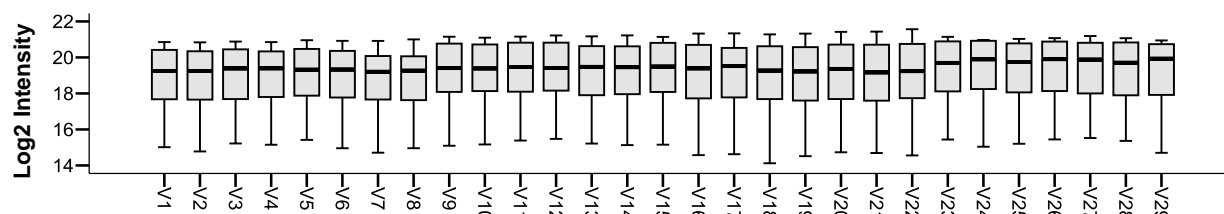

**Panel A)** Batch variability of internal standards in test pools

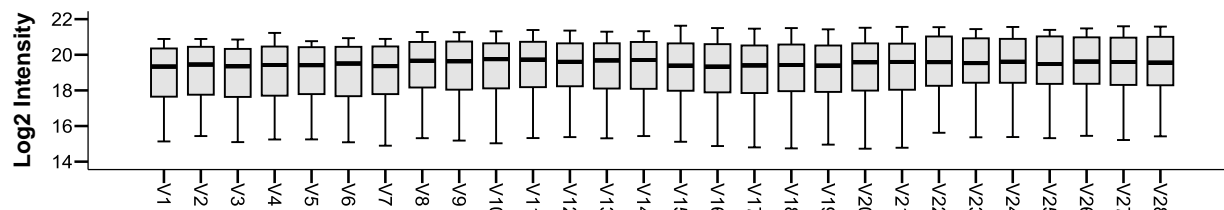

**Panel B:** Batch variability of internal standards in pooled plasma
